# Supplementary material for: Enhanced electrical and broad spectral (UV-Vis-NIR) photodetection in a Gr/ReSe2/Gr heterojunction
Source: Royal Society of Chemistry journal article supplement (doi:10.1039/d0dt01164a), 2020-01-01
Supplement: d0dt01164a1.pdf [file d0dt01164a1.pdf]

## Supplementary Information

### Enhanced electrical and broad spectral (UV-Vis-NIR) photodetection in Gr/ReSe<sub>2</sub>/Gr heterojunction

Ehsan Elahi<sup>1#</sup>, Muhammad Farooq Khan<sup>2#\*</sup>, Shania Rehman<sup>2#</sup>, H.M. Waseem Khalil<sup>3</sup>, Malik

Abdul Rehman<sup>4</sup>, Deok-kee Kim<sup>2\*</sup>, Honggyun Kim<sup>2</sup>, Karim Khan<sup>5,6</sup>, Moazzam Shahzad<sup>7</sup>,

Muhammad Waqas Iqbal<sup>1</sup> and Muhammad Abdul Basit<sup>8</sup> and Fasihullah Khan<sup>9</sup>

<sup>1</sup>Department of Physics, Riphah International University, 14 Ali Road, Lahore, Pakistan. <sup>2</sup>Department of Electrical Engineering, Sejong University, 209 Neungdong-ro, Gwangjin-gu, Korea. <sup>3</sup>Department of Electrical Engineering, College of Engineering and Technology, University of Sargodha, Pakistan. <sup>4</sup>Department of Nanotechnology and Advanced Material Engineering and Graphene Research Institute, Sejong University, Seoul 05006, Korea. <sup>5</sup>School of Electrical Engineering & Intelligentization, Dongguan University of Technology (DGUT), Dongguan, 523808, Guangdong, China. <sup>6</sup>Institute of Microscale Optoelectronics, Collaborative Innovation Centre for Optoelectronic Science & Technology, Key Laboratory of Optoelectronic Devices and Systems of Ministry of Education and Guangdong Province, College of Physics and Optoelectronic Engineering, Shenzhen Key Laboratory of Micro-Nano Photonic Information Technology, Guangdong Laboratory of Artificial Intelligence and Digital Economy (SZ), Shenzhen University, Shenzhen 518060, P.R. China. <sup>7</sup>Federal Urdu University of Science and Technology G-7/1, Islamabad, Pakistan. <sup>8</sup>Department of Materials Science and Engineering, Institute of Space Technology, Islamabad 44000, Pakistan. <sup>9</sup>Davision of Electronics and Electrical Engineering, Dongguk University, 04620 Seoul, Korea.

# These authors contributed equally.

Corresponding authors: [mfk@sejong.ac.kr](mailto:mfk@sejong.ac.kr) & [Deokkeekim@sejong.ac.kr](mailto:Deokkeekim@sejong.ac.kr)

# **S1. Raman spectra of ReSe<sub>2</sub> and graphenes.**

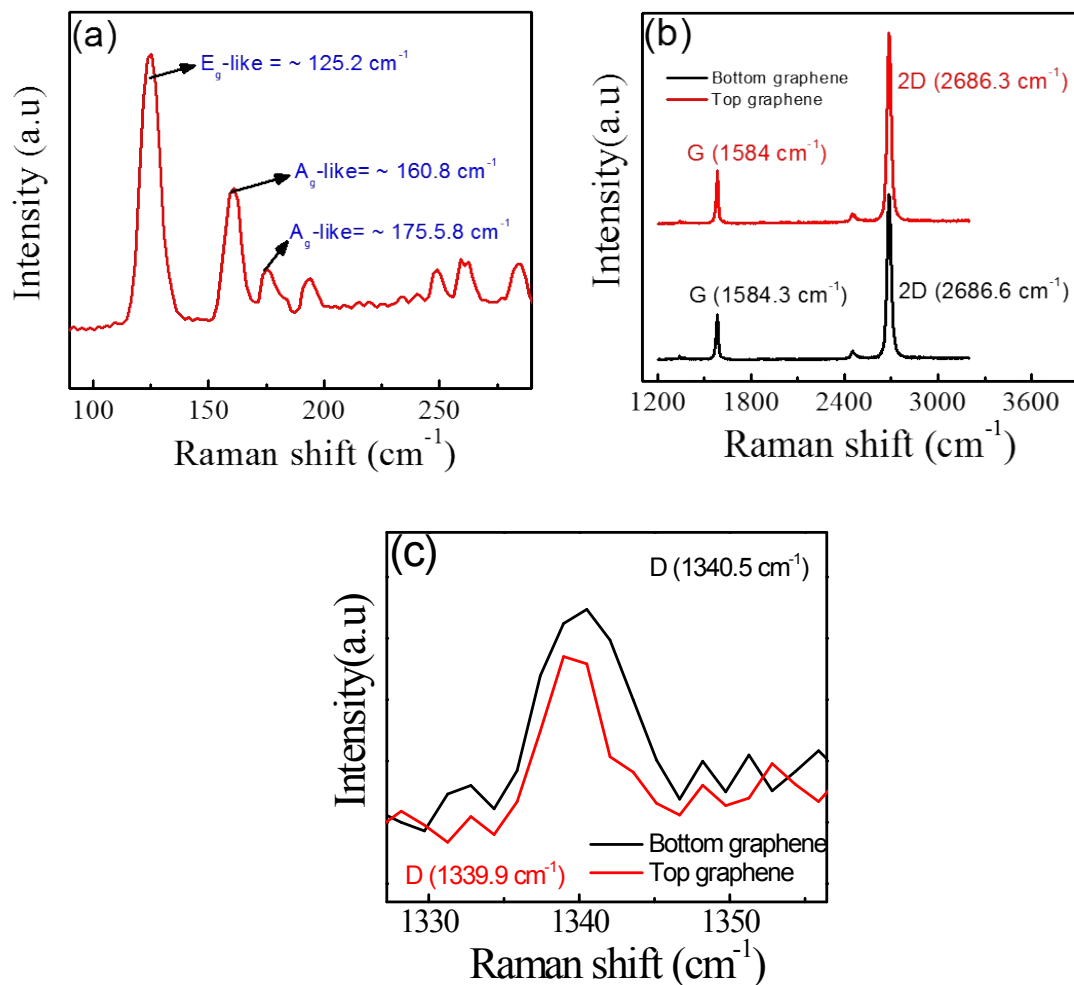

**Figure S1.** (a) The Raman spectrum of multilayer ReSe<sub>2</sub>. (b) The Raman spectrum of bottom and top CVD graphenes. (c) The zoom in view of 'D' peaks of G<sub>B</sub> and G<sub>T</sub>. The data of Figure S1c is take from Figure S1b.

## S2. Measurement of Schottky barrier height

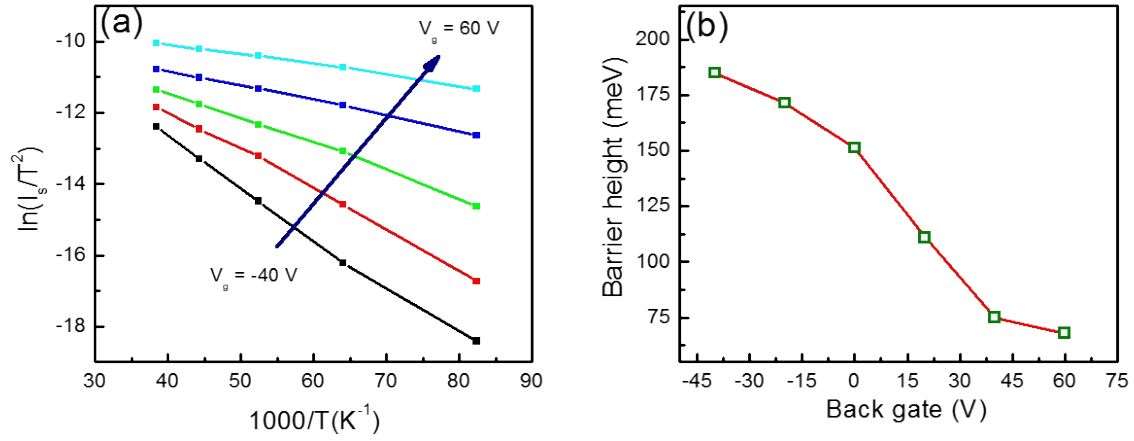

**Figure S2. (a)** Arrhenius plot  $\ln(I_s/T^2)$  vs  $1000/T$  at various back-gate voltages. **(b)** Extraction of Schottky barrier height values from the Arrhenius plot under each  $V_g$ .

### Gate and wavelength dependent $I_{sc}$

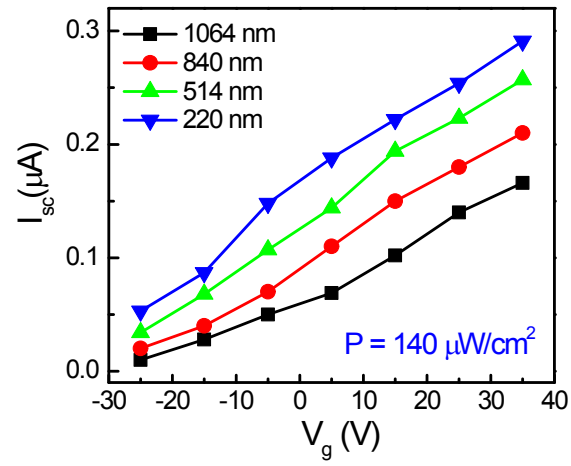

**Figure S3.** The dependence of  $I_{sc}$  at different back gate voltages and wavelength numbers.

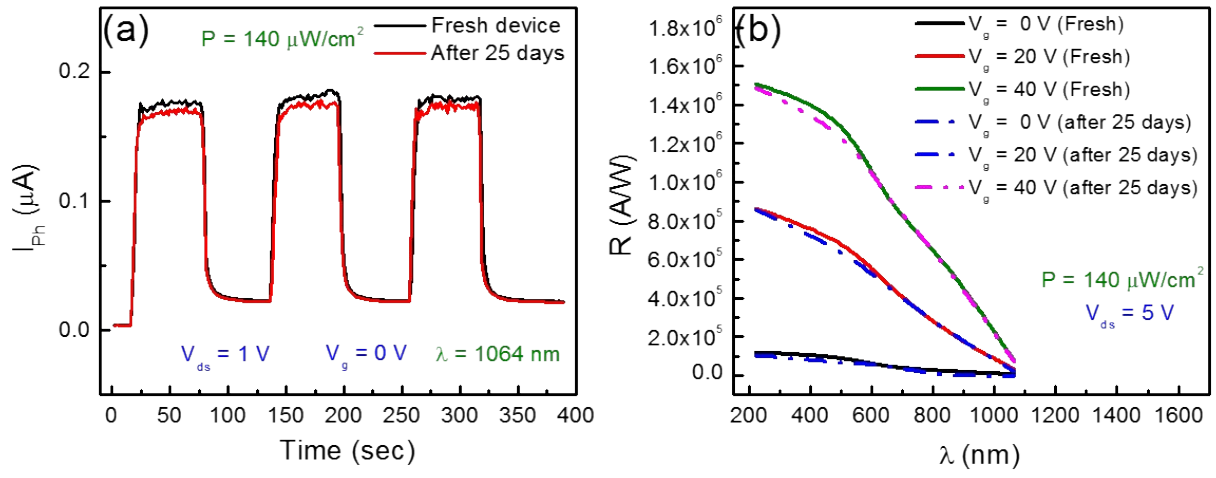

**Figure S4.** (a) Temporal response of our devices after 25 days at  $\lambda = 1064$  nm. (b) The photoresponsivity of GT-ReSe2-GB photodetectors at different back gate voltages. The performance of devices looks almost stable after 25 days.

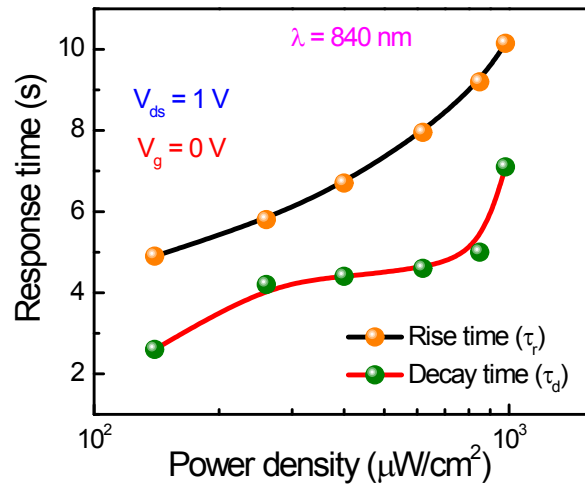

**Figure 5S.** Rise and decay times of  $G_B$ -ReSe<sub>2</sub>- $G_T$  photodetector at different power densities.
